# Supplementary material for: Effective Biofilm Eradication on Orthopedic Implants with Methylene Blue Based Antimicrobial Photodynamic Therapy In Vitro
Source: MDPI journal article supplement (doi:10.3390/antibiotics12010118), 2023-01-08
Supplement: s1 [file s1]

# Supplementary Material for Manuscript: Effective biofilm eradication on orthopedic implants with methylene blue based antimicrobial photodynamic therapy *in vitro*

**Table S1:** Photodynamic inactivation of planktonic *Staphylococcus aureus*, *Escherichia coli*, *Staphylococcus epidermidis* and *Cutibacterium acnes* using different concentrations of methylene blue (MB) as average log<sub>10</sub> reduction of two or three independent biological replicates. The stars indicate 100% killing, i.e., no regrowth. MB only controls were performed with the determined minimum bactericidal concentration without regrowth (MBC<sub>100%</sub>).

## Log10 reduction

| Methylene blue        |                  |                |                       |                 |
|-----------------------|------------------|----------------|-----------------------|-----------------|
| concentration (µg/ml) | <i>S. aureus</i> | <i>E. coli</i> | <i>S. epidermidis</i> | <i>C. acnes</i> |
| 0.25                  | 1.57             | 1.42           | 2.49                  | 2.30            |
| 0.50                  | 2.06             | 3.17           | 4.48                  | 3.98**          |
| 1.00                  | 4.11             | 6.19**         | 6.07**                | 5.94*           |
| 2.50                  | 5.67             | 6.19*          | 6.21*                 | 6.26*           |
| 5.00                  | 5.91*            | 6.19*          | 6.07*                 | 5.94*           |
| 10.00                 | 5.98*            | 6.19*          | 6.07*                 | 5.94*           |
| MB only               | 2.39             | 2.03           | 2.20                  | 1.23            |
| Light only            | 0.15             | 0.03           | 0.00                  | 0.24            |

\*100% killing, i.e. no regrowth

\*\*Minimum bactericidal concentration with 100% killing and no regrowth (=MBC<sub>100%</sub>)

Methylene blue only was tested with the concentration of the MBC<sub>100%</sub> (5 µg/ml for *S. aureus*, 1 µg/ml for *E. coli* and *S. epidermidis*, 0.5 µg/ml for *C. acnes*)

**Table S2:** Photodynamic inactivation of early (2-day-old) and mature (6-day-old) *Staphylococcus aureus* biofilms formed on polyethylene (PE), titanium alloy (TAV), cobalt-chromium-molybdenum (CCM) and polymethyl methacrylate (PMMA) based bone cement discs. The average log<sub>10</sub> reductions of two or three independent biological replicates using different methylene blue (MB) concentrations are presented. The stars indicate 100% killing, i.e., no regrowth. MB only controls were performed with the determined minimum bactericidal concentration without regrowth (MBC<sub>100%</sub>).

**Log10 reduction**

| Methylene blue | PE    |       | TAV   |       | CCM   |       | PMMA Cement |       |
|----------------|-------|-------|-------|-------|-------|-------|-------------|-------|
| concentration  |       |       |       |       |       |       |             |       |
| (µg/ml)        | 2d    | 6d    | 2d    | 6d    | 2d    | 6d    | 2d          | 6d    |
| 1.00           | 1.70  | 1.12  | 1.50  | 1.61  | 1.20  | 1.12  | 1.02        | 1.65  |
| 10.00          | 2.80  | 3.96  | 2.82  | 3.66  | 2.03  | 3.05  | 1.98        | 3.79  |
| 50.00          | 4.73  | 5.54  | 4.03  | 5.04  | 3.83  | 3.89  | 2.46        | 4.97  |
| 100.00         | 5.62* | 5.87* | 4.41* | 5.68* | 5.34* | 4.56* | 3.46*       | 5.62* |
| MB only        | 3.34  | 2.73  | 1.54  | 3.37  | 2.70  | 3.18  | 2.35        | 3.39  |
| Light only     | 0.00  | 0.05  | 0.31  | 0.37  | 0.06  | 0.22  | 0.07        | 0.31  |

**Table S3:** Photodynamic inactivation of mature biofilms of methicillin resistant *Staphylococcus aureus* (6d), *Escherichia coli* (6d), *Staphylococcus epidermidis* (6d) and *Cutibacterium acnes* (8d) formed on polyethylene (PE) discs. The average log<sub>10</sub> reductions of two or three independent biological replicates using different methylene blue (MB) concentrations are presented. The stars indicate 100% killing, i.e., no regrowth. MB only controls were performed with the determined minimum bactericidal concentration without regrowth (MBC<sub>100%</sub>).

#### Log10 reduction

| Methylene blue        |       |                |                       |                 |
|-----------------------|-------|----------------|-----------------------|-----------------|
| concentration (µg/ml) | MRSA  | <i>E. coli</i> | <i>S. epidermidis</i> | <i>C. acnes</i> |
| 1.00                  | 1.66  | 0.48           | 1.28                  | 1.46            |
| 10.00                 | 5.13  | 1.37           | 2.14                  | 2.93            |
| 50.00                 | 4.04  | 2.73           | 3.94*                 | 3.09**          |
| 100.00                | 6.91* | 5.28*          | 5.44*                 | 3.75*           |
| MB only               | 3.06  | 3.64           | 2.68                  | 1.96            |
| Light only            | 0.00  | 0.00           | 0.11                  | 0.00            |

MB, Methylene blue

6d biofilm for MRSA, *E. coli* and *S. epidermidis*, 8d biofilm for *C. acnes*

\*100% killing, i.e. no regrowth

\*\*minimum bactericidal concentration with 100% killing and no regrowth (=MBC<sub>100%</sub>)

Methylene blue only was tested with the concentration of the MBC<sub>100%</sub>

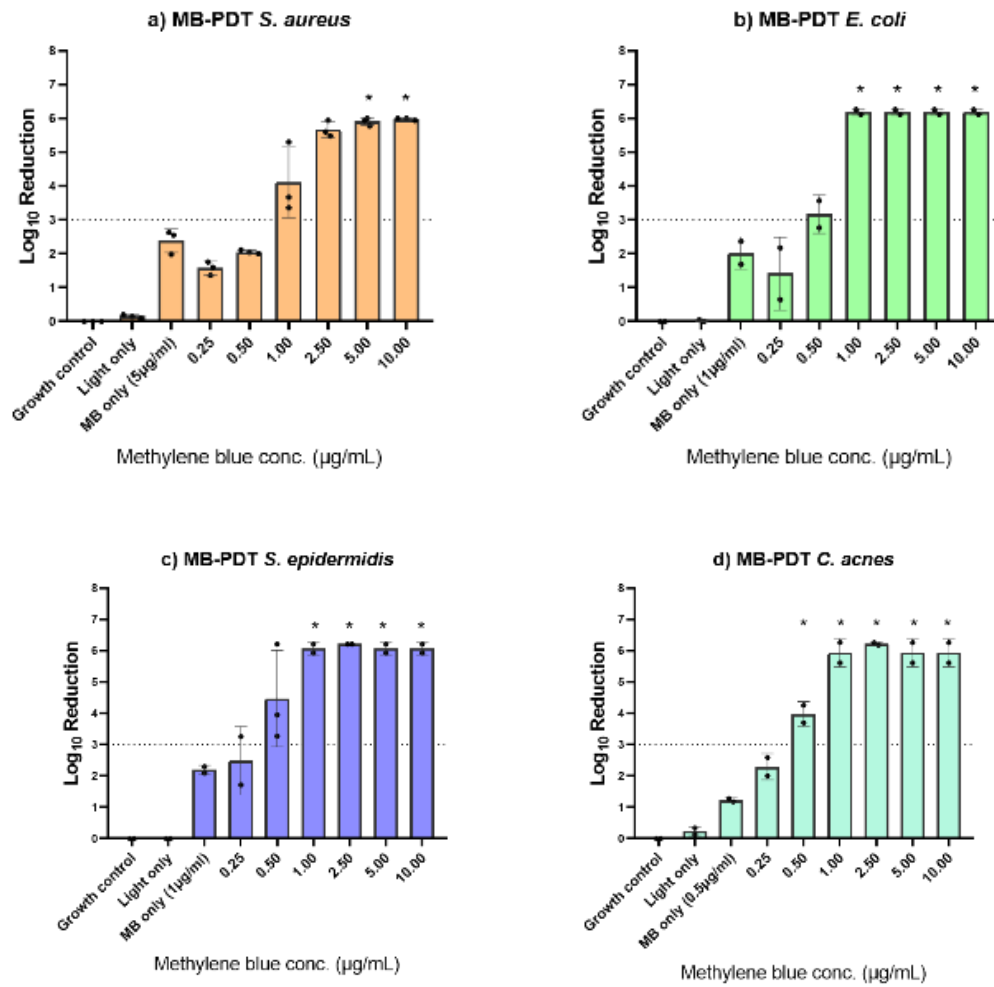

**Figure S1.** Photodynamic inactivation of planktonic *Staphylococcus aureus* (a), *Escherichia coli* (b), *Staphylococcus epidermidis* (c) and *Cutibacterium acnes* (d) using different concentrations of methylene blue (MB). The bars show the average log<sub>10</sub> reduction with the standard deviation from two or three independent biological replicates. The dotted line signals a bactericidal effect (3 log<sub>10</sub> reductions). The stars above the bars indicate 100% killing, i.e. no regrowth. MB only controls were performed with the determined minimum bactericidal concentration without regrowth (MBC<sub>100%</sub>).

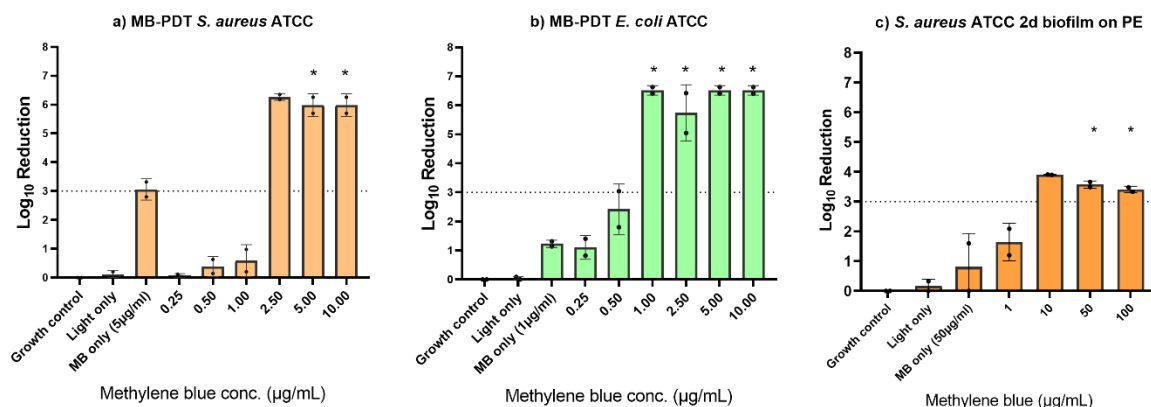

**Figure S2:** Photodynamic inactivation of planktonic ATCC *Staphylococcus aureus* (a), planktonic ATCC *Escherichia coli* (b) and 2-day-old ATCC *Staphylococcus aureus* biofilm formed on polyethylene (PE) (c) using different concentrations of methylene blue (MB). The bars show the average  $\text{log}_{10}$  reduction with the standard deviation from two independent biological replicates. The dotted line signals a bactericidal effect (3  $\text{log}_{10}$  reductions). The stars above the bars indicate 100% killing, i.e. no regrowth. MB only controls were performed with the determined minimum bactericidal concentration without regrowth ( $\text{MBC}_{100\%}$ ).

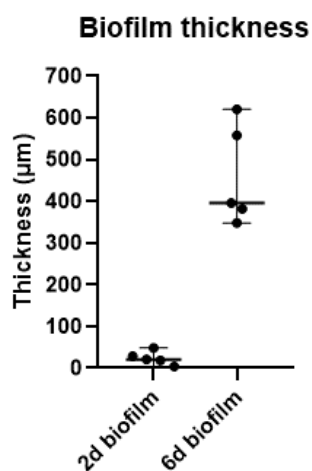

**Figure S3:** Biofilm thickness of 2-day-old and 6-day-old *Staphylococcus aureus* biofilm.

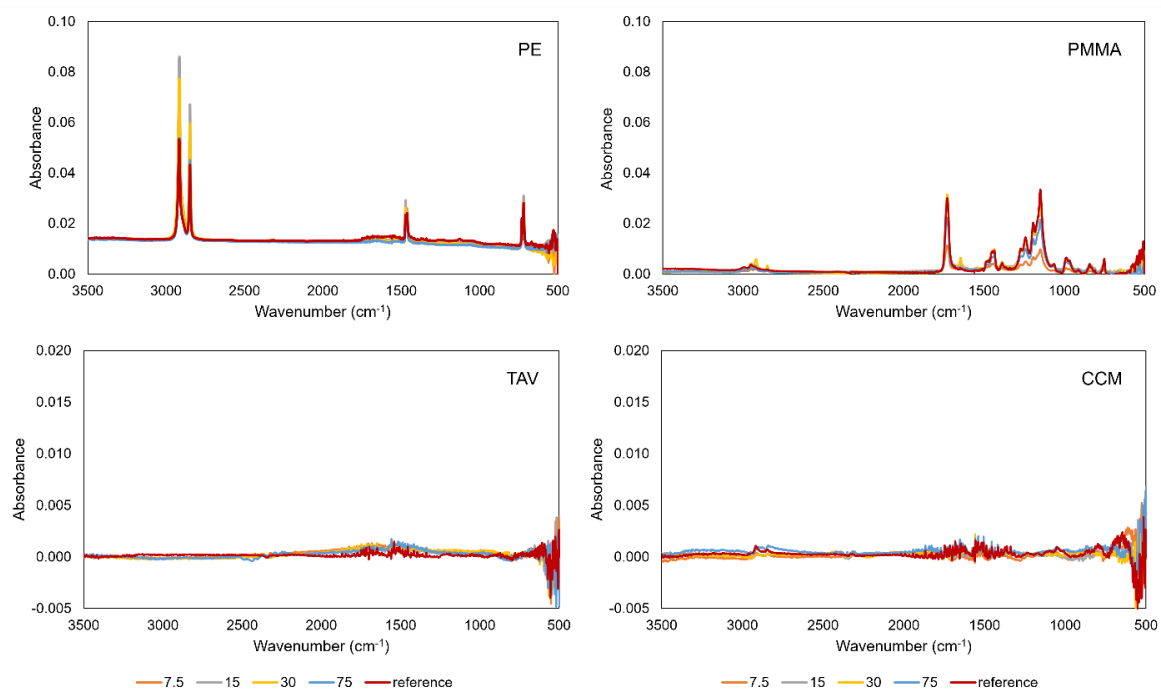

**Figure S4:** Attenuated total reflection infrared spectroscopy spectra of four different albumin-coated implant materials (PE, polyethylene; PMMA, polymethyl methacrylat; TAV, titanium alloy; CCM, cobalt-chromium-molybdenum) treated with methylene blue photodynamic therapy (MB-PDT) using light doses ranging from 7.5 to 75 J/cm<sup>2</sup>. No differences between the reference and the treated samples are visible. Adsorption of albumin was only measured on the PMMA cement materials.

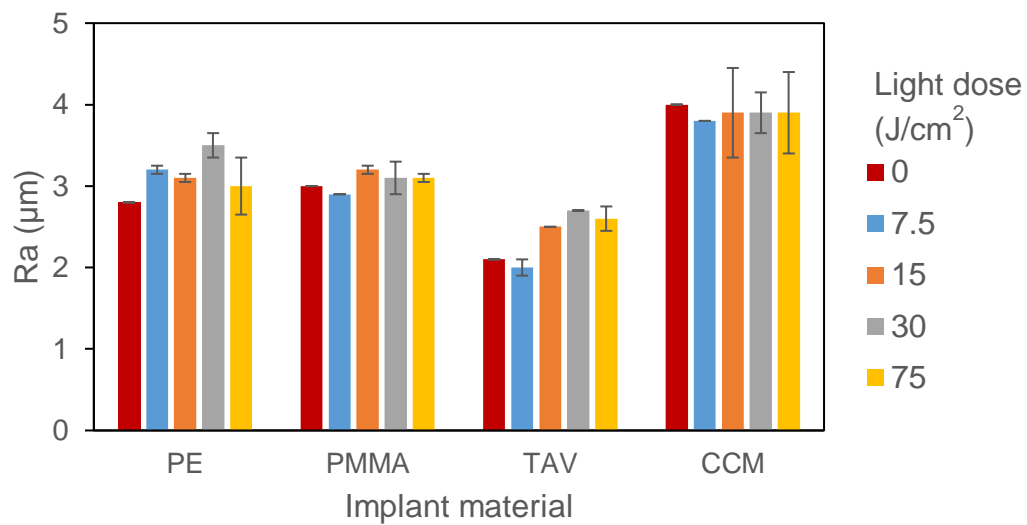

**Figure S5:** Roughness average (Ra) values of four different albumin-coated implant materials (PE, polyethylene; PMMA, polymethyl methacrylat; TAV, titanium alloy; CCM, Cobalt-chromium-molybdenum) treated with methylene blue photodynamic therapy (MB-PDT) using light doses ranging from 7.5 to 75  $\text{J}/\text{cm}^2$  compared to the untreated (0  $\text{J}/\text{cm}^2$ ) reference materials.

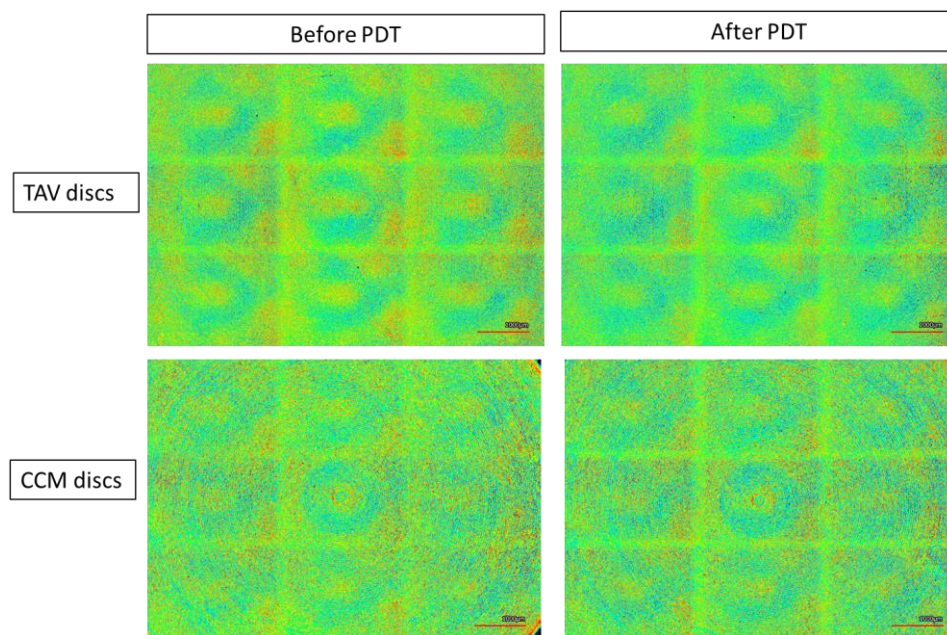

**Figure S6:** Example confocal laser scanning microscopy pictures of implant discs (top: TAV, titanium alloy; bottom: CCM, cobalt-chromium-molybdenum) before PDT (left) and after PDT (right). Scale bar = 1000  $\mu\text{m}$ . No cracks or damages are visually seen after photodynamic therapy.
